# Supplementary material for: Cost–consequence analysis of self-administration of medication during hospitalization: a pragmatic randomized controlled trial in a Danish hospital setting
Source: PubMed Central journal article supplement — Ther Adv Drug Saf. 2020 Aug 29;11:2042098620929921. doi: 10.1177/2042098620929921 (PMC7457413; doi:10.1177/2042098620929921), 2020-08-29
Supplement: Appendix_TAW.pdf [file Appendix_TAW.pdf]

## Appendix 1: Nurse time use and the association with the number of medications, dispensings, and administrations

### Introduction

This appendix reports the findings of the linear regression analyses to explore the associations between the number of medications, dispensings and administrations and the time use of nurses.

We assume that the association between time use and activities can be represented by a linear regression, where time use,  $t$ , is determined by a fixed component,  $a$ , and a variable component,  $N$ , e.g. number of medications, where  $b$  is the average additional cost per medication and  $e$  is the error term:

$$(1) \quad t = a + b \cdot N + e$$

For each time use activity we assess the presence of the fixed and variable components based on the significance of the coefficients  $a$  (fixed component) and  $b$  (variable component) using a threshold of  $p \leq 0.05$ .

It could be considered that the time it takes to perform various tasks depends on the nurse's level of experience. On the other hand, compared to many other nursing tasks, dispensing and administration of medicine are relatively small, frequent and simple tasks where experience can quickly be obtained. For that reason and due to small sample size we did not adjust for nursing experience.

### SAM START-UP

To start SAM the nurse will meet with the patient and provide instructions of general nature as well as go through the medications one by one. We hypothesize that there is a fixed component as well as a positive association between time use and number of medications, i.e.  $a > 0$  and  $b > 0$ .

| SAM start-up time (seconds)             |        |         |
|-----------------------------------------|--------|---------|
|                                         | Coef.  | P-value |
| Constant                                | 384.06 | 0.050   |
| Number of self-administered medications | 155.84 | 0.000   |
| R-squared                               | 0.5525 |         |

### Conclusion

We find that both the constant term and the number of medications contribute significantly to the time use ( $p \leq 0.05$ ; Table above). Therefore the nurse time used on SAM start-up can be expressed by the formula, where  $N$  is the number of self-administered medications:

$$(2) \quad t = 384.1 \text{sec} + 155.8 \text{sec} \cdot N$$

Converted to minutes, this means that there is a fixed time of 6.4 minutes used for all patients irrespective of number of medications, and a variable component of 2.6 minutes per medication. We therefore use equation (2) to predict time use in the full sample based on number of medications.

### DISPENSING

Nurses dispense medication to the patients one or more times per day. Each time he or she may dispense one or several medications and we would expect the time use to depend primarily on number of medications and doses during the day. We hypothesize that  $a = 0$  and  $b > 0$ .

| Time use per dispensing (measured for the control group) (seconds): |        |         |
|---------------------------------------------------------------------|--------|---------|
|                                                                     | Coef.  | P-value |
| Constant                                                            | 15.45  | 0.56    |
| Number of dispensed medications                                     | 29.08  | 0.000   |
| R-squared                                                           | 0.2401 |         |

### Conclusion:

From the regression analysis we see, that time used on dispensing is statistically significantly associated with the number of dispensed medications. The coefficient to the constant term was not significant, so we exclude it and

use the mean time use (32.8 sec; SD:21.0sec) per dispensing to estimate the total time use for the full sample (expressed by formula (3), where N is the number of dispensed medications):

$$(3) \quad t=32.8\text{sec} * N$$

Converted to minutes, this means a nurse time use of 0.6 minutes per dispensed medication.

### ADMINISTRATION

Administration of medication consists of the nurse picking up the already dispensed medications and administering it to the patient. This process is expected to be less dependent on number of medications. We hypothesize that  $a > 0$  and  $b = 0$ .

| Time use per administration (measured for the control group) (seconds): |        |         |
|-------------------------------------------------------------------------|--------|---------|
|                                                                         | Coef.  | P-value |
| Constant                                                                | 50.24  | 0.10    |
| Number of administered medications                                      | 6.52   | 0.29    |
| R-squared                                                               | 0.0584 |         |

### Conclusion

From the regression analyses we see, that the time use is not associated with the number of medications. We therefore used the mean time use (78.2 sec; SD 59.8 sec) per administration when estimating the total time use for administration in the full sample (expressed in the formula (4), where N is the number of administrations (medication rounds)).

$$(4) \quad t=78.2\text{sec} * N$$

Converted to minutes, this means a nurse time use of 1.3 minutes per administration.

### DISCHARGE

The preparation of discharge consists of a general discussion with the patient about the admission and what will happen after discharge and will also include instructions on medication. We expect that the time use will vary between the intervention who is already using familiar medication, and the control group. We therefore analyse the groups separately.

| Time use at discharge (Intervention group) (seconds): |         |         |
|-------------------------------------------------------|---------|---------|
|                                                       | Coef.   | P-value |
| Constant                                              | 1804.56 | 0.008   |
| Number of medications                                 | -19.42  | 0.83    |
| R-squared                                             | 0.0031  |         |

| Discharge (Control group) (seconds): |         |         |
|--------------------------------------|---------|---------|
|                                      | Coef.   | P-value |
| Constant                             | 2389.67 | 0.009   |
| Number of medications                | -36.31  | 0.82    |
| R-squared                            | 0.0040  |         |

### Conclusion:

From the analyses we see, that there appears to be no significant association with the number of medications in either of the groups. Therefore we use the mean nurse time used on discharge for each of the groups to estimate the time use for the full sample:

#### Intervention group (n=19):

$$(5) \quad t=1653.1 \text{ sec (SD: 1036.sec)}$$

Converted to minutes, this means a nurse time use of 27.6 minutes per discharge.

Control group (n=16):

(6) t= 2221.8 sec (SD: 1402.6sec)

Converted to minutes, this means a nurse time use of 37.0 minutes per discharge.

**Appendix 2: Sensitivity analyses**

| Variation                                                         | Total cost (2018€) |         | Incremental cost (I-C) | Change in conclusion |
|-------------------------------------------------------------------|--------------------|---------|------------------------|----------------------|
|                                                                   | Intervention       | Control |                        |                      |
| <b>Minimum/Maximum analyses (Base case -2.7 €)</b>                |                    |         |                        |                      |
| C <sub>new</sub> minimum value is used, others are the same       | 47.28              | 49.35   | -2.08                  | Fewer savings        |
| C <sub>new</sub> maximum value is used, others are the same       | 52.48              | 55.84   | -3.36                  | Additional savings   |
| C <sub>usual</sub> minimum value is used, others are the same     | 48.55              | 50.47   | -1.92                  | Fewer savings        |
| C <sub>usual</sub> maximum value is used, others are the same     | 51.20              | 54.72   | -3.52                  | Additional savings   |
| C <sub>m</sub> minimum value is used, others are the same         | 49.84              | 52.53   | -2.69                  | No change            |
| C <sub>m</sub> maximum value is used, others are the same         | 49.91              | 52.66   | -2.75                  | No change            |
| C <sub>disp</sub> minimum value is used, others are the same      | 49.59              | 50.82   | -1.23                  | Fewer savings        |
| C <sub>disp</sub> maximum value is used, others are the same      | 50.16              | 54.37   | -4.21                  | Additional savings   |
| C <sub>adm</sub> minimum value is used, others are the same       | 49.43              | 51.58   | -2.16                  | Fewer savings        |
| C <sub>adm</sub> maximum value is used, others are the same       | 50.32              | 53.61   | -3.29                  | Additional savings   |
| CSAM <sub>start</sub> minimum value is used, others are the same  | 48.98              | 52.59   | -3.61                  | Additional savings   |
| CSAM <sub>start</sub> maximum value is used, others are the same  | 50.77              | 52.59   | -1.83                  | Fewer savings        |
| C <sub>discharge</sub> minimum value is used, others are the same | 44.74              | 44.92   | -0.17                  | Fewer savings        |

|                                                                                                             |       |       |       |                    |
|-------------------------------------------------------------------------------------------------------------|-------|-------|-------|--------------------|
| Cdischarge maximum value is used, others are the same                                                       | 55.01 | 60.27 | -5.26 | Additional savings |
| <b>Change in assumptions</b>                                                                                |       |       |       |                    |
| The participant brings and uses al their usual medication. The hospital only has to provide new medication. | 46.15 | 52.59 | -6.44 | Additional savings |
| Unit labor cost changed to 40.69 € per hour *                                                               | 53.18 | 56.44 | -3.26 | Additional savings |
| Only costs for nursing time                                                                                 | 32.86 | 38.26 | -5.40 | Additional savings |

\*Average hourly labor cost for a Danish nurse (Source: Dansk Sygepleje Råd 2019)
